# Supplementary material for: Nitration of 2,6,8,12-Tetraacetyl-2,4,6,8,10,12-Hexaazaisowurtzitane Derivatives
Source: MDPI journal article supplement (doi:10.3390/ma15227880), 2022-11-08
Supplement: s1 [file s1]

# **Nitration of 2,6,8,12-Tetraacetyl-2,4,6,8,10,12-Hexaazaisowurtzitane Derivatives**

**Maya V. Chikina \*, Daria A. Kulagina and Sergey V. Sysolyatin**

Laboratory for Medicinal Chemistry, Institute for Problems of Chemical and Energetic Technologies, Siberian Branch of the Russian Academy of Sciences (IPCET SB RAS), 659322 Biysk, Russia

\* Correspondence: chikina\_maya@mail.ru; Tel.: +7-3854-30-15-45

## **Figure of Contents**

|                                                                       |       |
|-----------------------------------------------------------------------|-------|
| $^1\text{H}$ , $^{13}\text{C}$ NMR spectra for compounds 7 and 8..... | S1–S4 |
|-----------------------------------------------------------------------|-------|

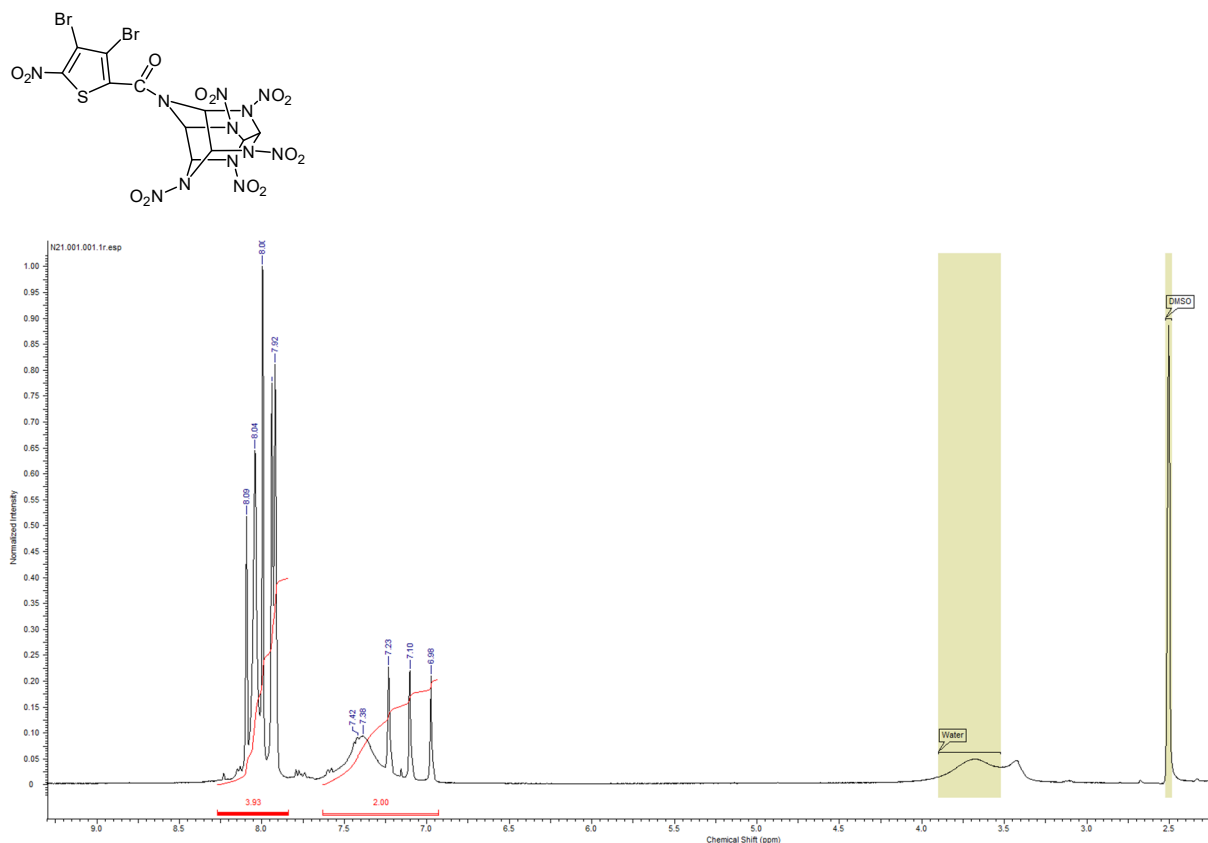

**Figure S1.** <sup>1</sup>H NMR spectrum of 4-(2-Nitro-3,4-dibromothiophenecarbonyl)-2,6,8,10,12-pentanitrohexaazaisowurtzitane **7** in DMSO-d<sub>6</sub>

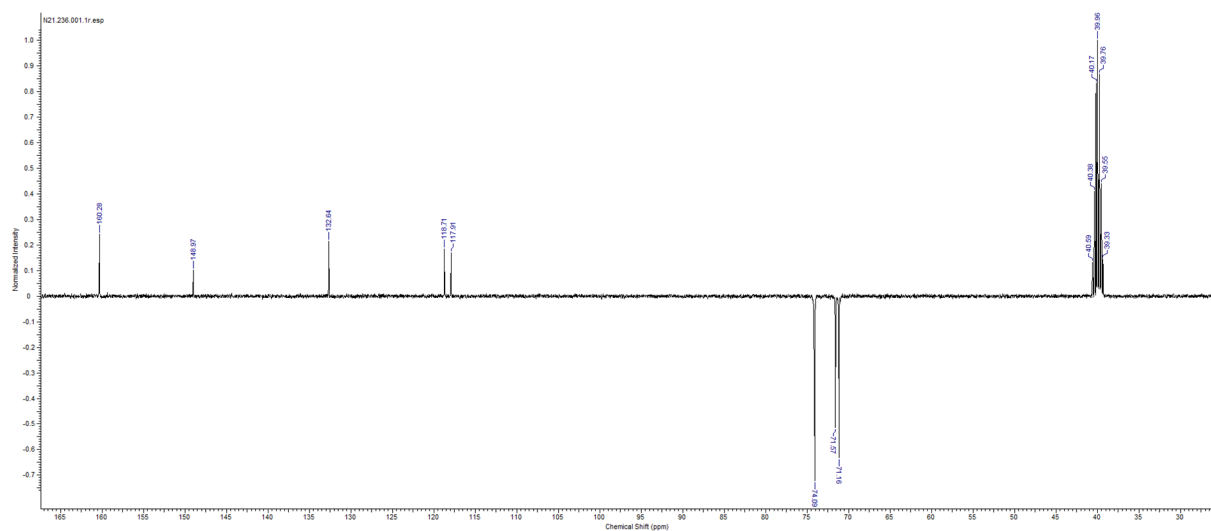

**Figure S2.** <sup>13</sup>C NMR spectrum of 4-(2-Nitro-3,4-dibromothiophenecarbonyl)-2,6,8,10,12-pentanitrohexaazaisowurtzitane **7** in DMSO-d<sub>6</sub>

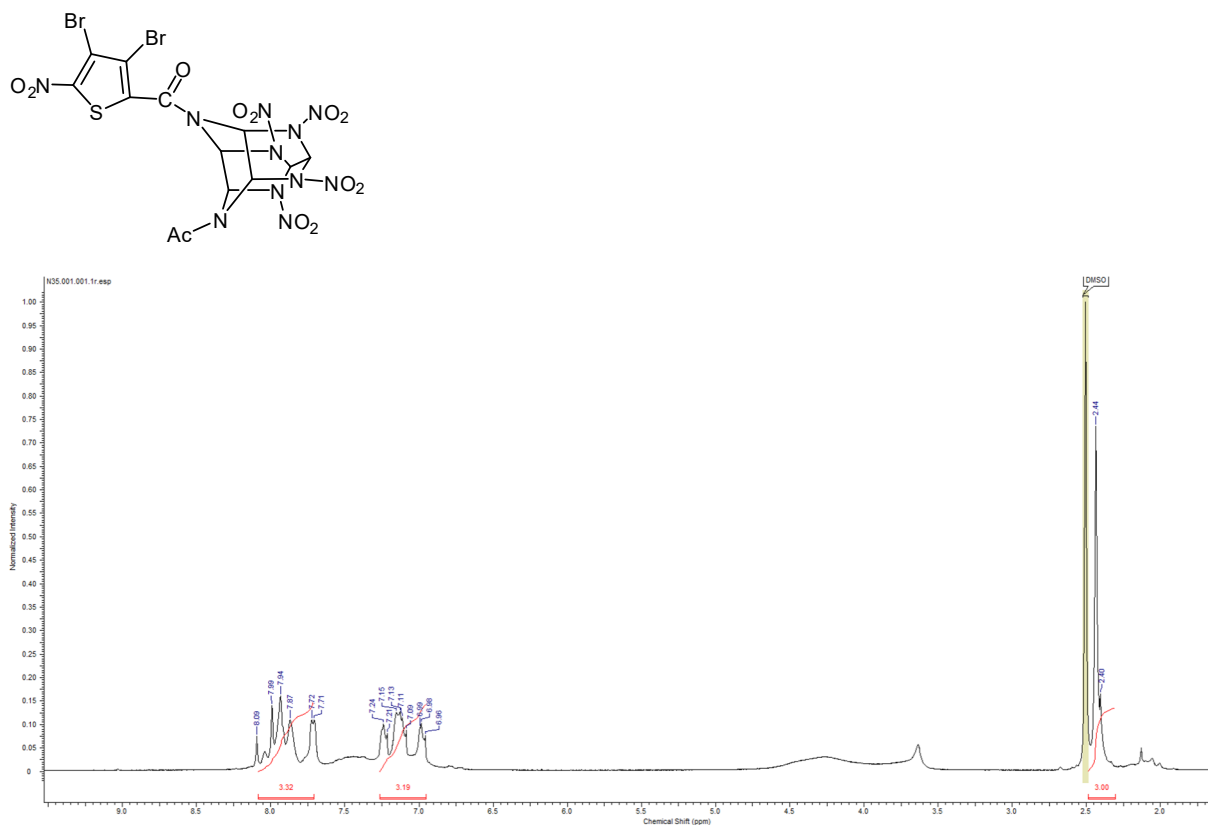

**Figure S3.** <sup>1</sup>H NMR spectrum of 4-(2-Nitro-3,4-dibromothiophenecarbonyl)-10-acetyl-2,6,8,12-tetranitro-2,4,6,8,10,12-hexaazaisowurtzitane **8** in DMSO-d<sub>6</sub>

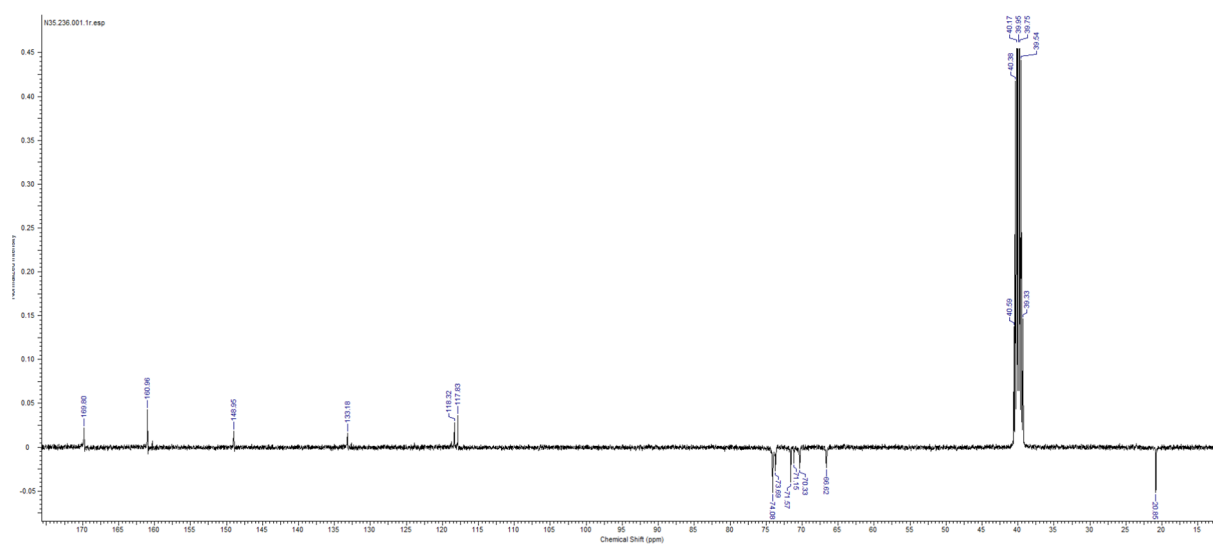

**Figure S4.** <sup>13</sup>C NMR spectrum of 4-(2-Nitro-3,4-dibromothiophenecarbonyl)-10-acetyl-2,6,8,12-tetranitro-2,4,6,8,10,12-hexaazaisowurtzitane **8** in DMSO-d<sub>6</sub>
